# Supplementary material
Source: publisher site journal article supplement (https://www.dovepress.com/get_supplementary_file.php?f=360191.docx)
Supplement: Supplementary file 1 [file get_supplementary_file.php]

# Supplementary Table 1 Minimum inhibitory concentration distribution of quality control and reference strains in the test

| **Purpose** | **Organism** | **Antifungal agent** | **CLSI* MIC range, µg/ml** | | **Our test** | |
| --- | --- | --- | --- | --- | --- | --- |
| **24hour** | **48hour** | **24hour** | **48hour** |
| QC | *Candida parapsilosis* ATCC 22019 | AMB | 0.25–2 | 0.5–4 | 0.5 | 2 |
| ISA | 0.016–0.06 | 0.03–0.12 | 0.03 | 0.06 |
| VOR | 0.016–0.12 | 0.03–0.25 | 0.06 | 0.12 |
| QC | *Candida krusei* ATCC 6258 | AMB | 0.5–2 | 1–4 | 2 | 4 |
| ISA | 0.06–0.5 | 0.12–0.5 | 0.25 | 0.5 |
| VOR | 0.06–0.5 | 0.12–1 | 0.5 | 1 |
| Reference | *Aspergillus flavus* ATCC 204304 | AMB | NA | 0.5–4 | NA | 4 |
| ISA | 0.5–4 | 2 |
| VOR | 0.5–4 | 2 |
| Reference | *Aspergillus fumigatus* ATCC MYA-3627 | AMB | NA | 0.5–4 | NA | 4 |
| ISA | NA | NA |
| VOR | 0.25–1 | 1 |

**Note:** *CLSI M61 Ed2.

**Abbreviations:** AMB, Amphotericin B; CLSI, Clinical and Laboratory Standards Institute; ISA, isavuconazole; MIC, minimum inhibitory concentration; QC, quality control; VOR, voriconazole; NA, not applicable
